# Supplementary material
Source: publisher figshare collection journal article supplement (https://acs.figshare.com/ndownloader/files/3858190)
Supplement: Supplementary file 1 [file 3858190]

# Supporting Information

## **Bifunctional-Nano-Template Assisted Synthesis of Nanoporous SrTiO<sub>3</sub> Photocatalysts Toward Efficient Organic Pollutant Degradation**

Shuxin Ouyang,<sup>ab#\*</sup> Peng Li,<sup>c#</sup> Hua Xu,<sup>ab</sup> Hua Tong,<sup>ab</sup> Lequan Liu<sup>c</sup> and Jinhua Ye<sup>abc\*</sup>

<sup>a</sup> TU-NIMS Joint Research Center and Tianjin Key Laboratory of Composite and Functional Materials, School of Material Science and Engineering, Tianjin University, P.R. China.

<sup>b</sup> Collaborative Innovation Center of Chemical Science and Engineering (Tianjin), Tianjin 300072, P.R. China.

<sup>c</sup> Environmental Remediation Materials Unit and International Center for Materials Nanoarchitectonics (WPI-MANA), National Institute for Materials Science (NIMS), Japan.

<sup>#</sup> These authors contributed equally.

<sup>\*</sup> E-mail: [oysx@tju.edu.cn](mailto:oysx@tju.edu.cn); [jinhua.ye@nims.go.jp](mailto:jinhua.ye@nims.go.jp)

# Table of Contents

|                                                                                         |          |
|-----------------------------------------------------------------------------------------|----------|
| SI-1 Details of Synthesis and Characterizations                                         | Page S1  |
| SI-2 Characterizations of SiO <sub>2</sub> Nano-template                                | Page S3  |
| SI-3 Microstructural Feature and Chemical Compositions of Nanoporous SrTiO <sub>3</sub> | Page S4  |
| SI-4 Calculation of FWHM in XRD Pattern                                                 | Page S5  |
| SI-5 Influence of SiO <sub>2</sub> Nano-template on Crystallization                     | Page S6  |
| SI-6 Characterizations of Commercial Nano-SrTiO <sub>3</sub>                            | Page S8  |
| SI-7 More Detailed Data of Photocatalytic Characterizations                             | Page S9  |
| SI-8 Characterizations of Nanoporous Doped SrTiO <sub>3</sub>                           | Page S11 |
| SI-9 Characterizations of Nanoporous Alkali-metal Titanates                             | Page S14 |

## SI-1 Details of Synthesis and Characterizations

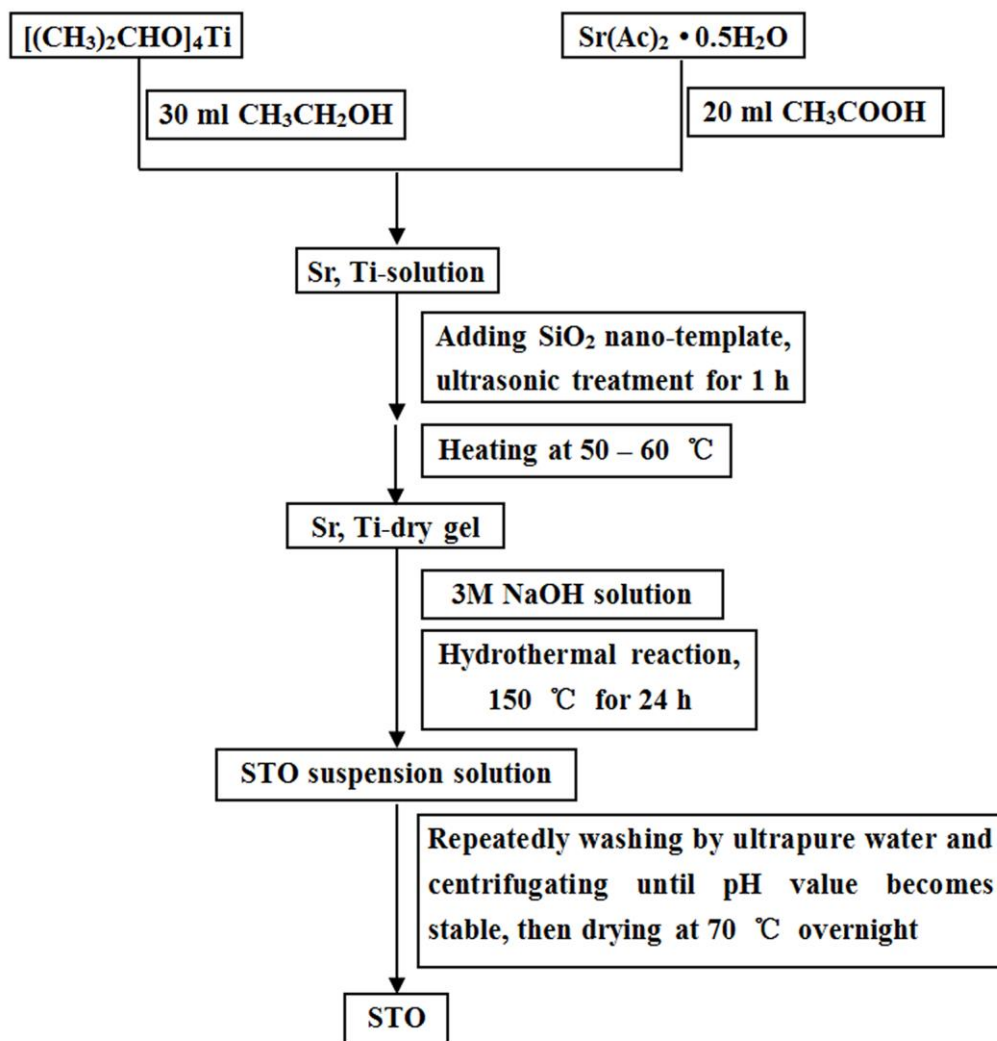

**Figure S1.** Synthetic flow chart of the micro-mesoporous SrTiO<sub>3</sub> photocatalyst.

**Table S1.** The synthesis details of other materials

| Samples                                        | Starting Materials <sup>#,*</sup>                                                                                                                                                                                                                                          | Reaction Conditions                                                            |
|------------------------------------------------|----------------------------------------------------------------------------------------------------------------------------------------------------------------------------------------------------------------------------------------------------------------------------|--------------------------------------------------------------------------------|
| Cr doped SrTiO <sub>3</sub>                    | 0.05 mmol Cr(NO <sub>3</sub> ) <sub>3</sub> •9H <sub>2</sub> O<br>4.95 mmol Sr(CH <sub>3</sub> COO) <sub>2</sub> •0.5H <sub>2</sub> O<br>5.00 mmol [(CH <sub>3</sub> ) <sub>2</sub> CHO] <sub>4</sub> Ti                                                                   | 3 M NaOH aqueous solution,<br>170 °C, 24 h                                     |
| La,Cr codoped SrTiO <sub>3</sub>               | 0.05 mmol La(NO <sub>3</sub> ) <sub>3</sub> •6H <sub>2</sub> O<br>0.05 mmol Cr(NO <sub>3</sub> ) <sub>3</sub> •9H <sub>2</sub> O<br>4.95 mmol Sr(CH <sub>3</sub> COO) <sub>2</sub> •0.5H <sub>2</sub> O<br>4.95 mmol [(CH <sub>3</sub> ) <sub>2</sub> CHO] <sub>4</sub> Ti | 3 M NaOH aqueous solution,<br>170 °C, 24 h                                     |
| Li <sub>2</sub> TiO <sub>3</sub>               | 20 mmol CH <sub>3</sub> COOLi<br>10 mmol [(CH <sub>3</sub> ) <sub>2</sub> CHO] <sub>4</sub> Ti                                                                                                                                                                             | 2 M NaOH + 1 M LiOH<br>aqueous solution, 150 °C, 24 h                          |
| Na <sub>2</sub> Ti <sub>3</sub> O <sub>7</sub> | 10 mmol CH <sub>3</sub> COONa<br>10 mmol [(CH <sub>3</sub> ) <sub>2</sub> CHO] <sub>4</sub> Ti                                                                                                                                                                             | 1 M NaOH aqueous solution,<br>150 °C, 24 h                                     |
| K <sub>2</sub> Ti <sub>4</sub> O <sub>9</sub>  | 10 mmol CH <sub>3</sub> COOK<br>10 mmol [(CH <sub>3</sub> ) <sub>2</sub> CHO] <sub>4</sub> Ti                                                                                                                                                                              | 1 M KOH + 1 M K <sub>2</sub> CO <sub>3</sub><br>aqueous solution, 150 °C, 24 h |

<sup>#</sup> All the samples were added 40 wt% SiO<sub>2</sub> nano-template in the sol-gel process.

<sup>\*</sup> The Cr(NO<sub>3</sub>)<sub>3</sub>•9H<sub>2</sub>O and La(NO<sub>3</sub>)<sub>3</sub>•6H<sub>2</sub>O were dissolved in ethylene glycol to prepare a certain concentration solutions in advance for precise doping. All the acetates were dissolved in glacial acetic acid and the [(CH<sub>3</sub>)<sub>2</sub>CHO]<sub>4</sub>Ti was dissolved in ethanol for the followed sol-gel process.

## SI-2 Characterizations of SiO<sub>2</sub> Nano-template

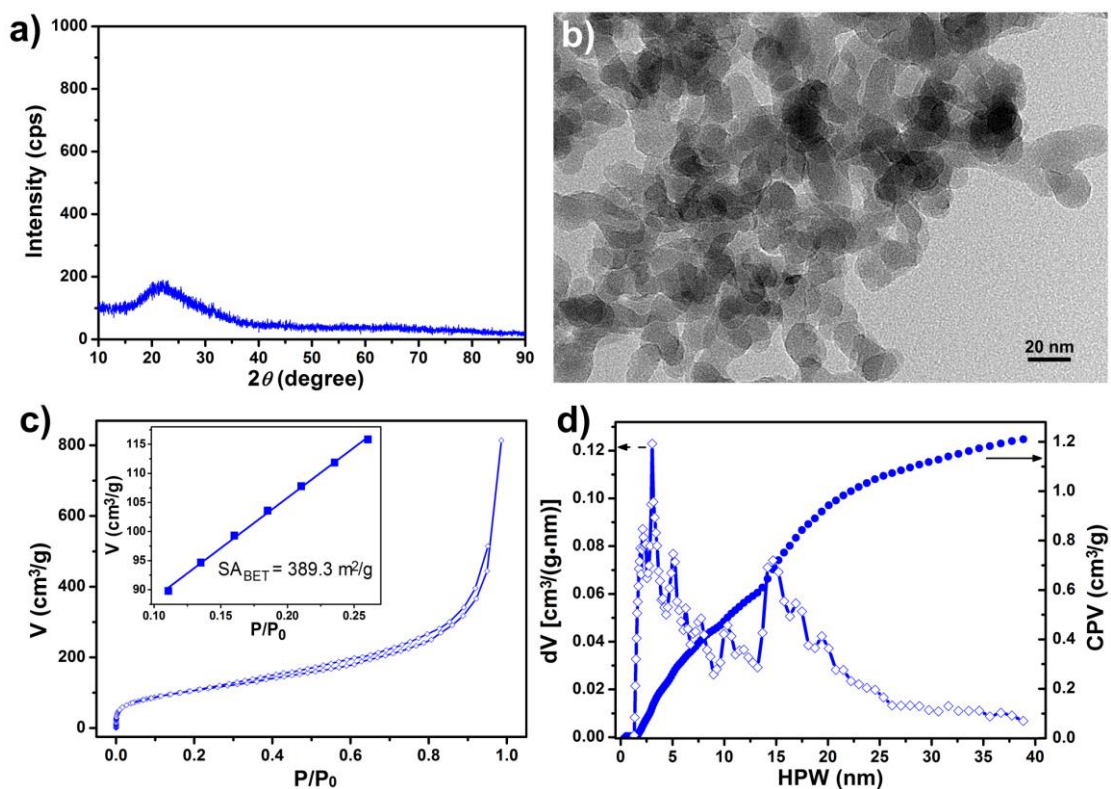

**Figure S2.** Characterizations of SiO<sub>2</sub> nano-template. (a) XRD pattern. (b) TEM image. (c) Nitrogen adsorption–desorption isotherms and linear part for BET surface area calculation (inset). (d) Pore distribution and cumulative pore volume analyzed by DFT simulation; HPW, half pore width; CPV, cumulative pore volume.

### SI-3 Microstructural Feature and Chemical Compositions of Nanoporous SrTiO<sub>3</sub>

**Table S2.** Pore types and distribution percentages

| Samples                   | Micropore / % | Mesopore I / %     | Mesopore II / % |
|---------------------------|---------------|--------------------|-----------------|
|                           | HPW < 1 nm    | 1 nm < HPW < 10 nm | 10 nm < HPW     |
| STO-SiO <sub>2</sub> -10% | 0             | 49.7               | 50.3            |
| STO-SiO <sub>2</sub> -20% | 1.1           | 65.3               | 33.6            |
| STO-SiO <sub>2</sub> -30% | 3.9           | 71.8               | 24.3            |
| STO-SiO <sub>2</sub> -40% | 3.7           | 77.4               | 18.9            |
| STO-SiO <sub>2</sub> -50% | 6.0           | 71.6               | 22.4            |
| STO-SiO <sub>2</sub> -60% | 5.6           | 75.4               | 19.0            |
| STO-SiO <sub>2</sub> -70% | 7.2           | 73.4               | 19.4            |
| STO-SiO <sub>2</sub> -80% | 8.8           | 73.6               | 17.6            |
| STO-SiO <sub>2</sub> -90% | 5.7           | 60.9               | 33.4            |

**Table S3.** Chemical Compositions of as-prepared SrTiO<sub>3</sub> samples

| Samples                   | Elements / wt% <sup>#</sup> |      |      | Molar Ratio of Sr : Ti |
|---------------------------|-----------------------------|------|------|------------------------|
|                           | Sr                          | Ti   | Si   |                        |
| STO-SiO <sub>2</sub> -10% | 41.2                        | 22.6 | 1.90 | 0.996 : 1.000          |
| STO-SiO <sub>2</sub> -30% | 40.0                        | 21.8 | 3.08 | 1.002 : 1.000          |
| STO-SiO <sub>2</sub> -50% | 38.9                        | 21.2 | 3.95 | 1.002 : 1.000          |
| STO-SiO <sub>2</sub> -90% | 37.0                        | 19.8 | 5.08 | 1.007 : 1.000          |

<sup>#</sup> The weight percentages of elements were measured by ICP-OES.

## SI-4 Calculation of FWHM in XRD Pattern

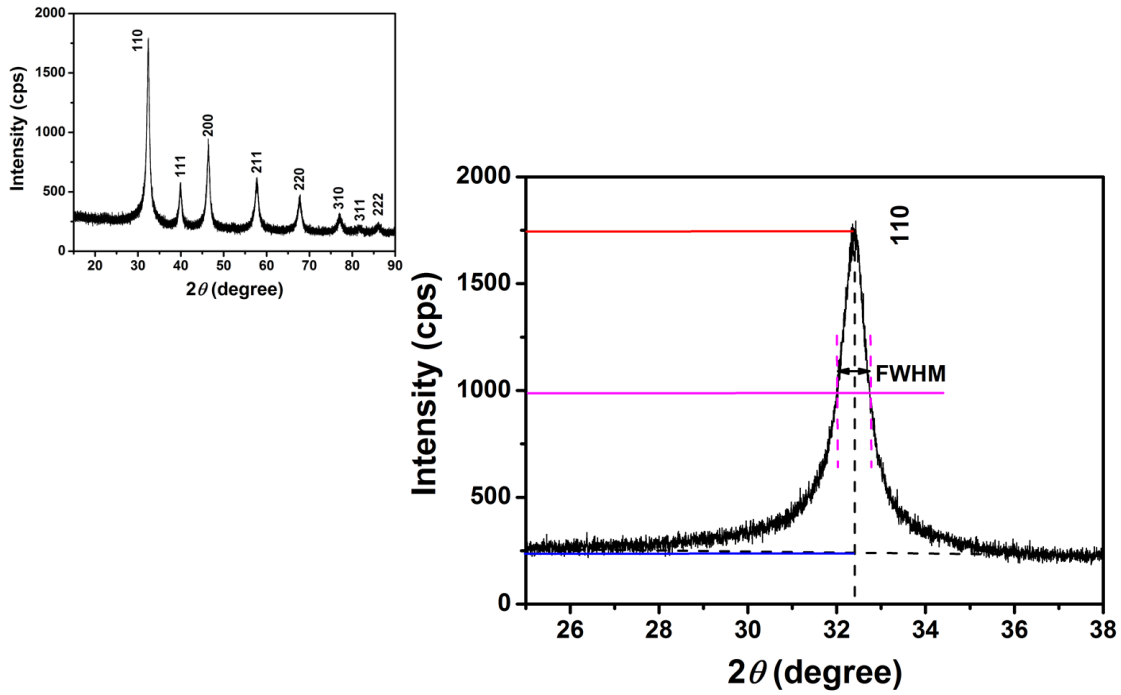

**Figure S3.** XRD patterns of STO-SiO<sub>2</sub>-30%.

Taking the STO-SiO<sub>2</sub>-30% sample as an example to introduce the calculation of the FWHM in the XRD pattern,

for all the SrTiO<sub>3</sub> samples in this study, we took the (110) peak as an index peak;

firstly, enlarging the (110) peak of XRD pattern, then marking the peak center and background as shown by the black dash lines;

secondly, recording the peak intensity,  $I_{peak}$ , as presented by the red line, then recording the background intensity (the crossing point of two black dash lines),  $I_{background}$  as presented by the blue line;

thirdly, calculating the intensity of the half maximum,  $I_{hm} = (I_{peak} - I_{background})/2 + I_{background} = (1762 - 231)/2 + 231 = 997$ ;

finally, marking the height of the half maximum (as shown by the magenta line) and measuring the FWHM = 0.720 °.

## SI-5 Influence of SiO<sub>2</sub> Nano-template on Crystallization

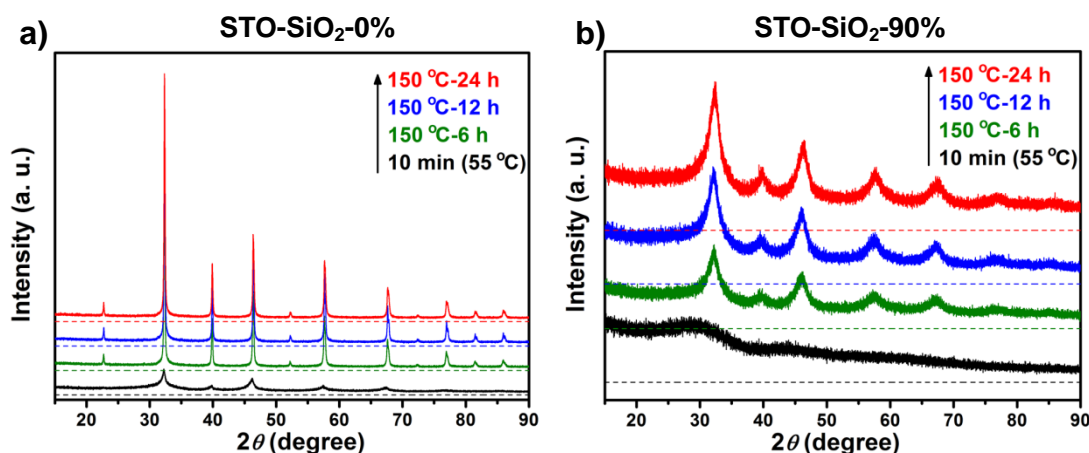

**Figure S4.** XRD patterns of SrTiO<sub>3</sub> samples without (a) and with (b) SiO<sub>2</sub> nano-template in synthesis. The dash lines are the baselines of each samples, where absolute intensities = 0

**Table S4.** Crystallinity variation of SrTiO<sub>3</sub> samples without and with SiO<sub>2</sub> nano-template in synthesis under different reaction times.

| Reaction Time               | <i>FWHM</i> of STO-SiO <sub>2</sub> -0% / ° | <i>FWHM</i> of STO-SiO <sub>2</sub> -90% / ° |
|-----------------------------|---------------------------------------------|----------------------------------------------|
| 10 min (55 °C) <sup>#</sup> | 0.66                                        | (amorphous)                                  |
| 150 °C 6 h                  | 0.19                                        | 1.98                                         |
| 150 °C 12 h                 | 0.18                                        | 2.04                                         |
| 150 °C 24 h                 | 0.18                                        | 1.84                                         |

<sup>#</sup>Before hydrothermal reaction, after adding NaOH (12 g) into the STO-gel suspension solution (100 mL), the highest temperature of solution reached 55 °C.

A contrast study of the reaction-time-dependent crystallinity variation between the STO-SiO<sub>2</sub>-0% and STO-SiO<sub>2</sub>-90% samples was carried out (Figure S4 and Table S4). According to the value change of *FWHM*, the sample without nano-template (STO-SiO<sub>2</sub>-0%) could crystallize quickly and reach growth equilibrium after 12 h hydrothermal treatment; in contrast, the sample with 90% nano-template (STO-SiO<sub>2</sub>-90%) underwent a very slow growing during the whole synthesis process. Thereby, it was found that the SiO<sub>2</sub> nano-template dominated the crystallization rate of SrTiO<sub>3</sub>.



**Table S5.** Conversion percentages of Si element from the SiO<sub>2</sub> to the Na<sub>2</sub>SiO<sub>3</sub> under different reaction times

| Reaction Time      | $CP_{HRS}^{\#}$ / % | $TCP^*$ / % |
|--------------------|---------------------|-------------|
| 0 min <sup>#</sup> | 0.0                 | -           |
| 10 min (55 °C)*    | 31.9                | -           |
| 150 °C 2 h         | 60.1                | -           |
| 150 °C 6 h         | 60.5                | -           |
| 150 °C 12 h        | 63.1                | -           |
| 150 °C 24 h        | 67.5                | 76.2        |

<sup>#</sup>  $CP_{HRS}$ , conversion percentage in hydrothermal reaction solution. The hydrothermal reaction solution was measured the Si concentration ( $[Si]_{HRS}$ ) by ICP-AES. The  $CP_{HRS} = [Si]_{HRS} * V_{HRS} / m(Si)_{template} * 100\%$ .

\*  $TCP$ , total conversion percentage. After hydrothermal reaction and separating samples from hydrothermal reaction solution, the samples were treated by ultrasonic-cleaning with ultrapure water and centrifugally separated. The solutions that contained the Na<sub>2</sub>SiO<sub>3</sub> desorbed from the sample surface were collected and mixed with the hydrothermal reaction solution, and then the mixed solution was concentrated and measured the Si concentration ( $[Si]_{HRS+OSS}$ ) by ICP-AES. The  $TCP = [Si]_{HRS+OSS} * V_{concentrated} / m(Si)_{template} * 100\%$ .

In NaOH aqueous solution, the SiO<sub>2</sub> reacts with NaOH to form Na<sub>2</sub>SiO<sub>3</sub>, and then the Na<sub>2</sub>SiO<sub>3</sub> can dissolve into water. The conversion of Si element from SiO<sub>2</sub> to Na<sub>2</sub>SiO<sub>3</sub> in the present synthesis can be detected via the inductance coupling plasma-optical emissive spectrum (ICP-OES) measurement for the reaction solution (Table S5). For the STO-SiO<sub>2</sub>-90% sample, at initial stage of synthesis (after adding NaOH into the precursor suspension solution and during beginning of the hydrothermal reaction), the conversion percentage of Si element from SiO<sub>2</sub> to Na<sub>2</sub>SiO<sub>3</sub> in hydrothermal reaction solution,  $CP_{HRS}$ , rapidly increased from 0% to 60.1%, because the big organic frame of precursor deconstructed into a large amount of sub-micro particles (tens to hundreds of nanometers in size) and released a lot of SiO<sub>2</sub> into solution. The process was accompanied with the formation of a huge number of tiny crystal nucleuses. However, the remnant SiO<sub>2</sub> nano-templates in the sub-micro particles dissolved to generate Na<sub>2</sub>SiO<sub>3</sub> and then dispersed from the inner of pores and the surface into solution very slowly, which could be supported by the evidence that the  $CP_{HRS}$  slightly increased from 60.1% to 67.5% during 2 h to 24 h of hydrothermal reaction. Furthermore, when we cleaned the STO-SiO<sub>2</sub>-90% sample under 24 h hydrothermal treatment carefully, and then collected the hydrothermal solution and all the cleaning solution to measured ICP-OES for calculating the total conversion percentage of Si element from SiO<sub>2</sub> to Na<sub>2</sub>SiO<sub>3</sub>,  $TCP$  (Table S5). It reached 76.2% which was obviously higher than the  $CP_{HRS}$ , indicating that the slow increase of Si element in hydrothermal solution with increasing the reaction time indeed resulted from the slow release of Na<sub>2</sub>SiO<sub>3</sub> from the surface and inner of SrTiO<sub>3</sub> particle.

## SI-6 Characterizations of Commercial Nano-SrTiO<sub>3</sub>

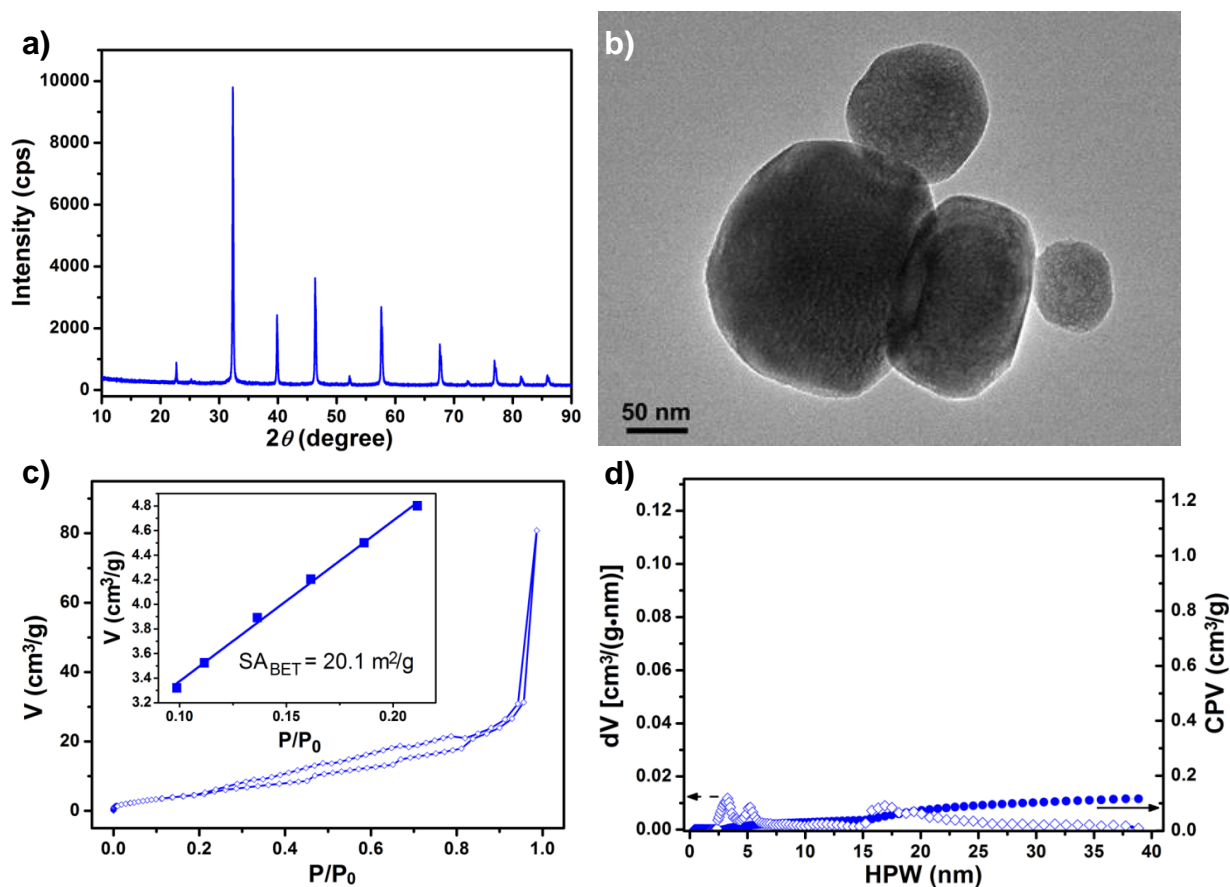

**Figure S5.** Characterization of commercial nano-sized SrTiO<sub>3</sub> (C-Nano-STO for short; No.329-43442, Wako, Japan). (a) XRD pattern. (b) TEM image. (c) Nitrogen adsorption–desorption isotherms and linear part for BET surface area calculation (inset). (d) Pore distribution and cumulative pore volume analyzed by DFT simulation; HPW, half pore width; CPV, cumulative pore volume.

## SI-7 More Detailed Data of Photocatalytic Characterizations

### IPA photodegradation over different STO samples

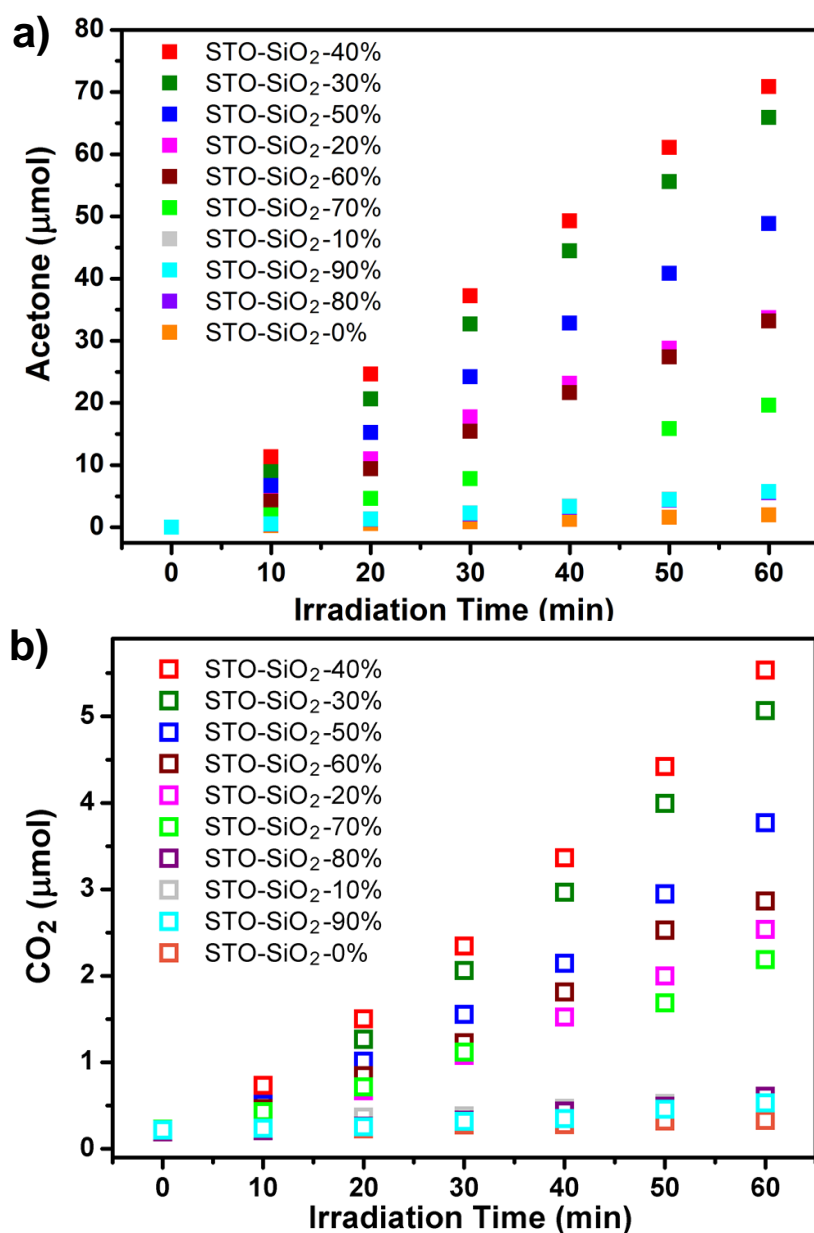

**Figure S6.** Acetone (a) and  $\text{CO}_2$  (b) evolution amounts over different  $\text{SrTiO}_3$  samples under UV-visible light irradiation ( $\lambda > 300$  nm) as a function of irradiation time.

### Stability test of IPA photodegradation over STO-SiO<sub>2</sub>-40%

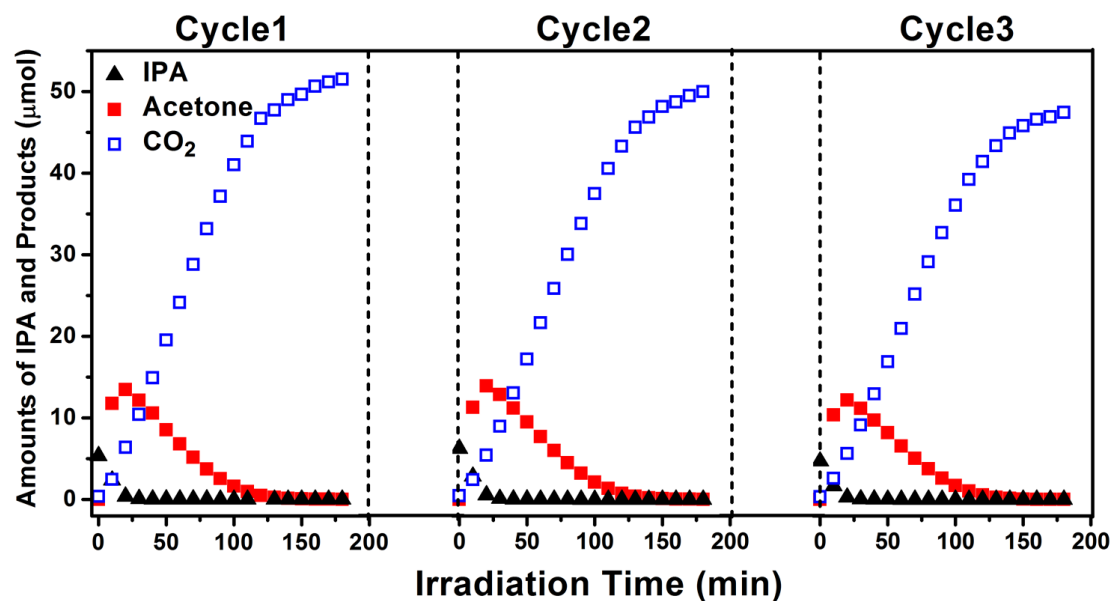

**Figure S7.** Cycle experiments of IPA photodegradation over STO-SiO<sub>2</sub>-40% under UV-visible light irradiation ( $\lambda > 300$  nm) with an irradiation period of 180 min.

## SI-8 Characterizations of Nanoporous Doped SrTiO<sub>3</sub>

To exemplify our synthetic process is available in the case of doped SrTiO<sub>3</sub>, we fabricated the Cr doped SrTiO<sub>3</sub> (Cr is doped into the Sr site of SrTiO<sub>3</sub>) and La, Cr codoped SrTiO<sub>3</sub> (La and Cr are doped into the Sr and Ti sites of SrTiO<sub>3</sub>, respectively). The detailed synthetic conditions are listed in Table S1.

The doped SrTiO<sub>3</sub> samples crystallize in the same symmetry as the undoped SrTiO<sub>3</sub> (Figure S8a) but extend their light absorption into visible region (Figure S8b). The hysteresis loops in the N<sub>2</sub> adsorption-desorption isotherms (Figure S9a, S10a) indicate that the porous structures exist in both Cr doped SrTiO<sub>3</sub> and La, Cr codoped SrTiO<sub>3</sub>. Similar to the undoped SrTiO<sub>3</sub>, the major pores in these samples are also HPW < 10 nm. However, the codoped material has more uniform pore than the mono-doped case (Figure S9b, S10b). Both they contain a little amount of micropore with a main size of 2 – 5 Å (Figure S9c, S10c). These doped samples are nanocrystal-constructed microspheres with average diameters of about 200 and 400 nm for Cr doped SrTiO<sub>3</sub> and La, Cr codoped SrTiO<sub>3</sub>, respectively (Figure S9d,e, S10d,e). The resolved lattice fringes observed from the edges of microspheres indicate the samples are crystallized (Figure S9f, S10f).

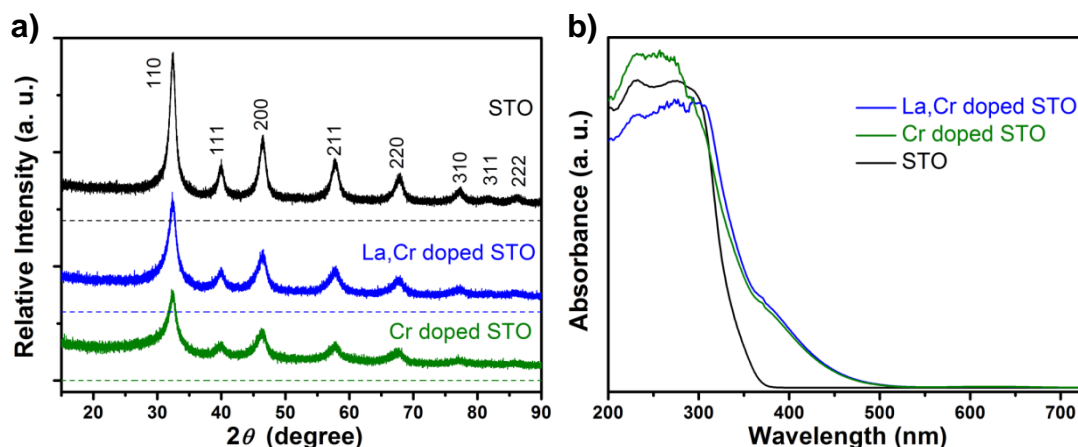

**Figure S8.** XRD patterns (a) and UV-visible absorption spectra (b) of SrTiO<sub>3</sub>, Cr doped SrTiO<sub>3</sub>, and La,Cr doped SrTiO<sub>3</sub>. (The SrTiO<sub>3</sub> reference sample was synthesized under the similar conditions of doped SrTiO<sub>3</sub> samples; 40% SiO<sub>2</sub> nano-template, 3 M NaOH, 170 °C, 24 h.)

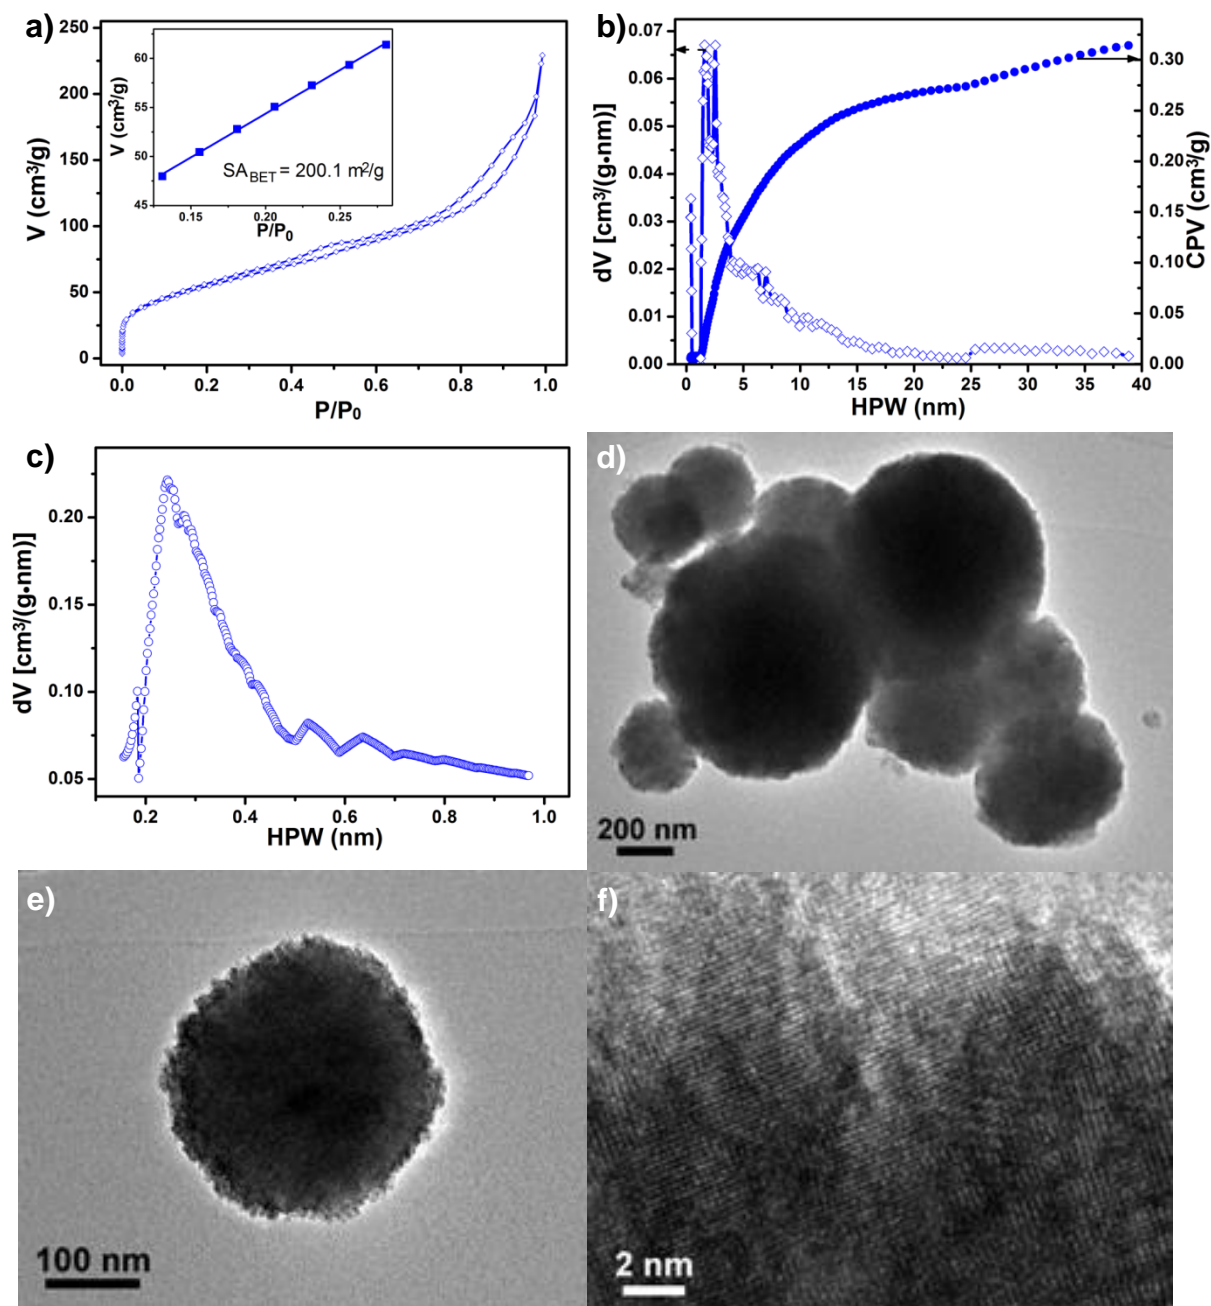

**Figure S9.** Pore and morphology characterizations for the Cr doped SrTiO<sub>3</sub> sample. (a) Nitrogen adsorption–desorption isotherms and linear part for BET surface area calculation (inset). (b,c) Pore distribution and cumulative pore volume analyzed by DFT (for micropore and mesopore) and HK (for micropore only) simulation; HPW, half pore width; CPV, cumulative pore volume. (d,e) TEM images. (f) HRTEM image.

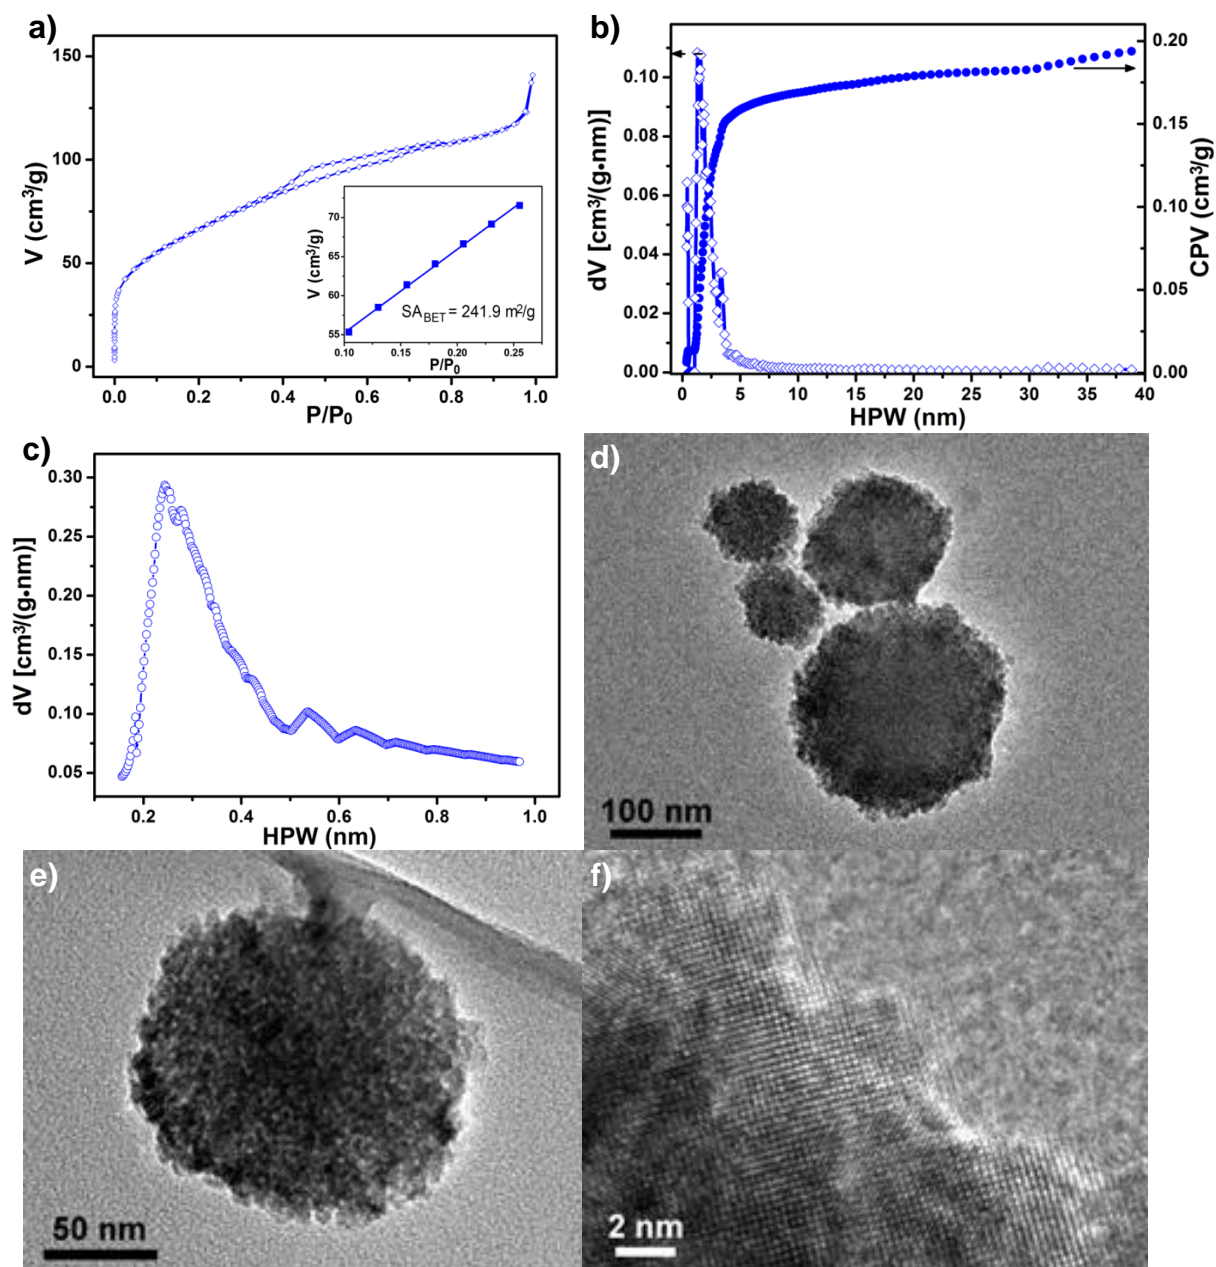

**Figure S10.** Pore and morphology characterizations for the La,Cr doped SrTiO<sub>3</sub> sample. (a) Nitrogen adsorption–desorption isotherms and linear part for BET surface area calculation (inset). (b,c) Pore distribution and cumulative pore volume analyzed by DFT (for micropore and mesopore) and HK (for micropore only) simulation; HPW, half pore width; CPV, cumulative pore volume. (d,e) TEM images. (f) HRTEM image.

## SI-9 Characterizations of Nanoporous Alkali-metal Titanates

To exemplify our synthetic process is applicable for the alkali-metal titanates, we synthesized three typical materials, such as  $\text{Li}_2\text{TiO}_3$ ,  $\text{Na}_2\text{Ti}_3\text{O}_7$ , and  $\text{K}_2\text{Ti}_4\text{O}_9$ . The detailed synthetic conditions are listed in Table S1.

The  $\text{Li}_2\text{TiO}_3$  grows in a monoclinic symmetry (Figure S11a). The  $\text{N}_2$  adsorption-desorption isotherm shows a typical hysteresis loop (Figure S11b), indicating this material possesses the porous structure. The HPW of these pores mainly distributes below 10 nm, but the micro-pore structure is not detected (Figure S11c). The BET surface area of this sample reaches  $215.2 \text{ m}^2/\text{g}$ . The TEM images present that this material are irregular particles which are loosely aggregated by a number of nanocrystals (Figure S11d), and thus some of these nanocrystals easily depart from the assembled particle to form monodispersed status (Figure S11e-f).

The  $\text{Na}_2\text{Ti}_3\text{O}_7$  also crystallizes in a monoclinic symmetry (Figure S12a). A typical hysteresis-loop figure in the  $\text{N}_2$  adsorption-desorption isotherm reveals the sample contains porous structure (Figure S12b). The material shows highly uniform pore-size distribution, and the HPW of the major pores is smaller than 5 nm, but the micro-pore structure is not observed (Figure S12c). The TEM images exhibit that this material are irregular particles with size from several hundred nanometers to several micrometers (Figure S12d).

The  $\text{K}_2\text{Ti}_4\text{O}_9$  grows as a monoclinic-phase structure (Figure S13a). The contained porous structure can be revealed by the typical hysteresis loop in the  $\text{N}_2$  adsorption-desorption isotherm (Figure S13b). This material also presents highly uniform pore size; the HPW mainly distributes below 5 nm (Figure S13c), and the micro-pore structure with a major HPW between 2 and 4 Å is detected (Figure S13d). The TEM images indicates that the sample is some aggregates of layered nanocrystals (Figure S13e,f; blue arrows mark the layered micro-structures); the particle size is from several hundred nanometers to several micrometers.



# 1. $\text{Li}_2\text{TiO}_3$

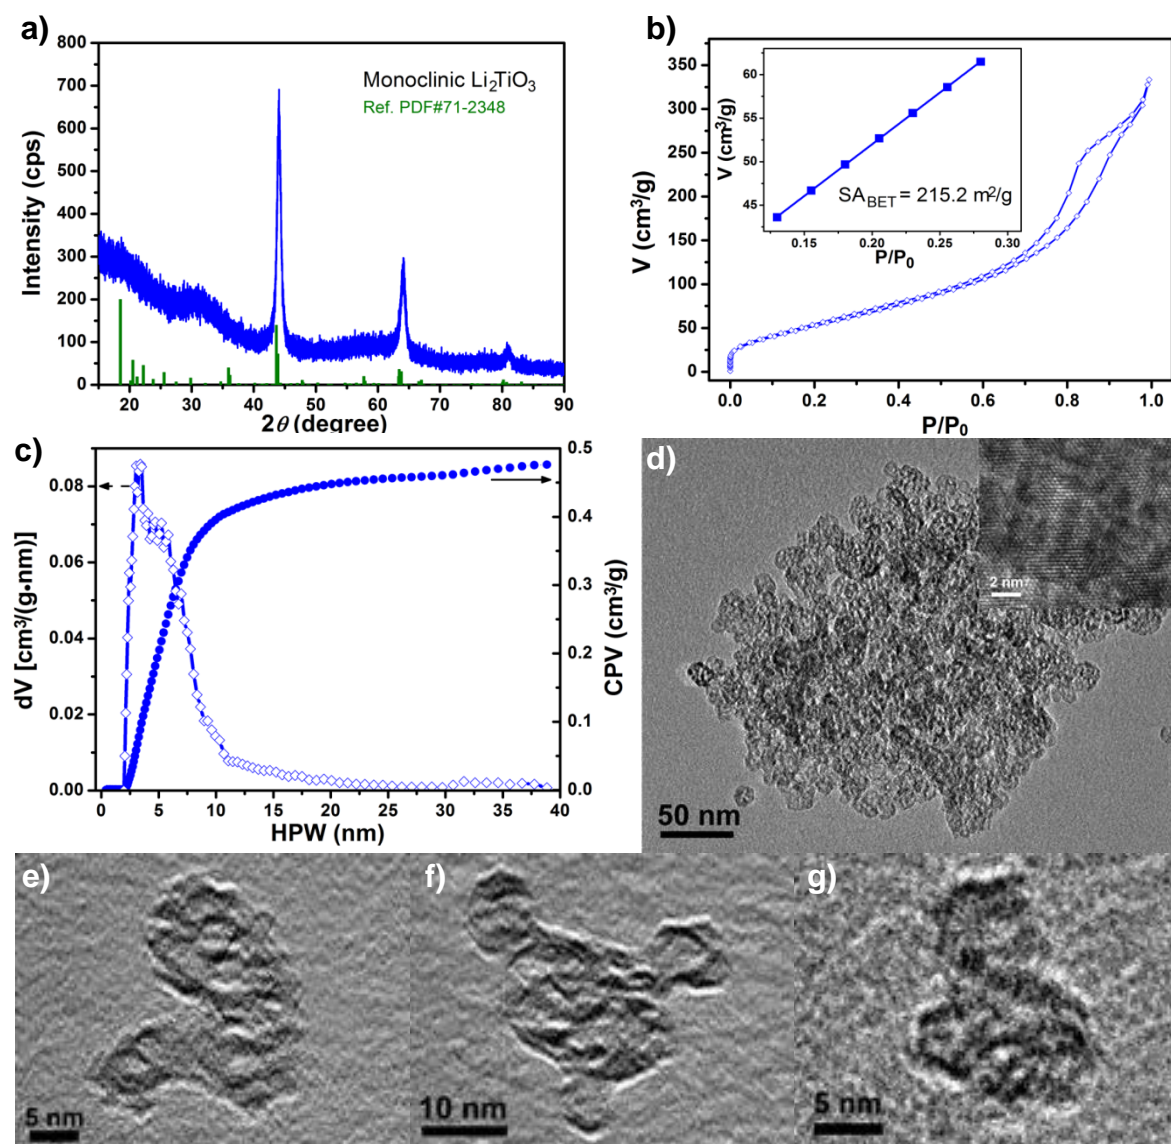

**Figure S11.** Crystal structure, pore and morphology characterizations for the  $\text{Li}_2\text{TiO}_3$  sample. (a) XRD pattern. (b) Nitrogen adsorption–desorption isotherms and linear part for BET surface area calculation (inset). (c) Pore distribution and cumulative pore volume analyzed by DFT simulation; HPW, half pore width; CPV, cumulative pore volume. (d~g) TEM images and (d, inset) HRTEM image.

## 2. $\text{Na}_2\text{Ti}_3\text{O}_7$

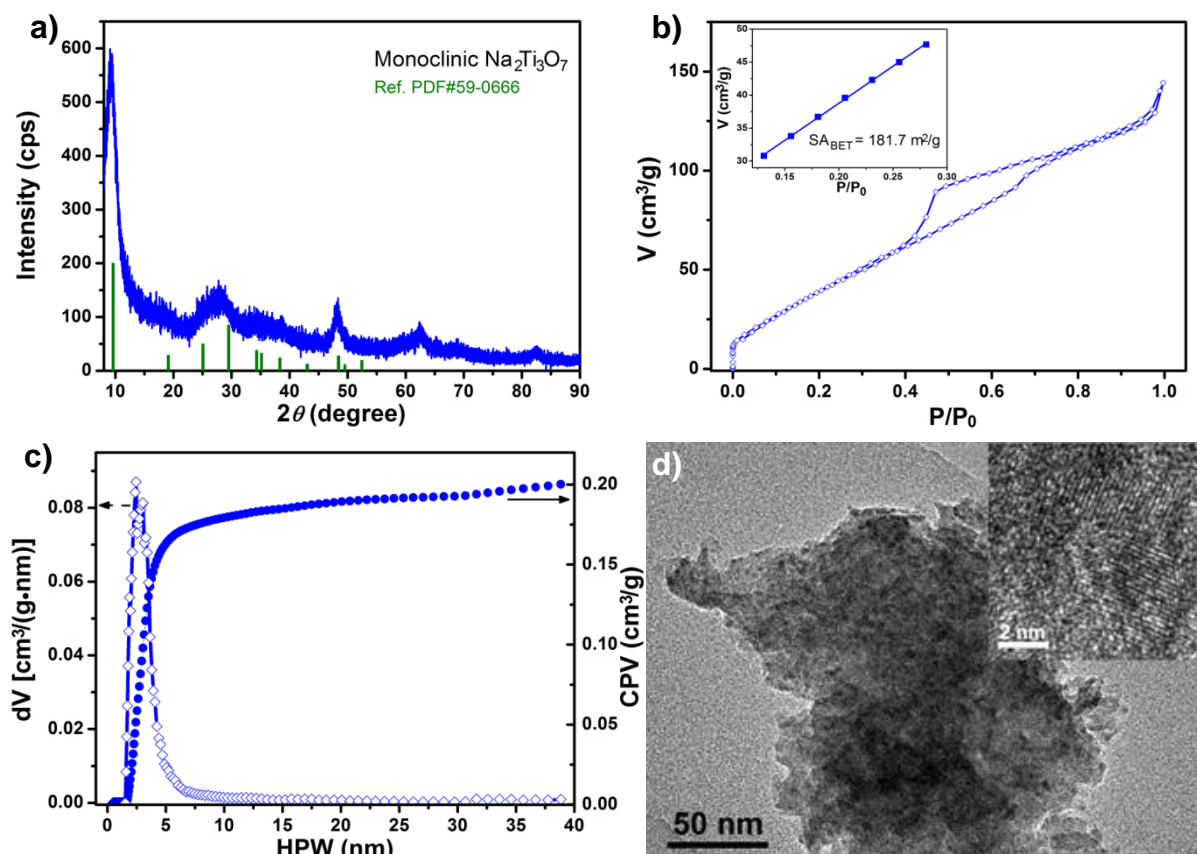

**Figure S12.** Crystal structure, pore and morphology characterizations for the  $\text{Na}_2\text{Ti}_3\text{O}_7$  sample. (a) XRD pattern. (b) Nitrogen adsorption–desorption isotherms and linear part for BET surface area calculation (inset). (c) Pore distribution and cumulative pore volume analyzed by DFT simulation; HPW, half pore width; CPV, cumulative pore volume. (d) TEM and HRTEM (inset) images.

### 3. $K_2Ti_4O_9$

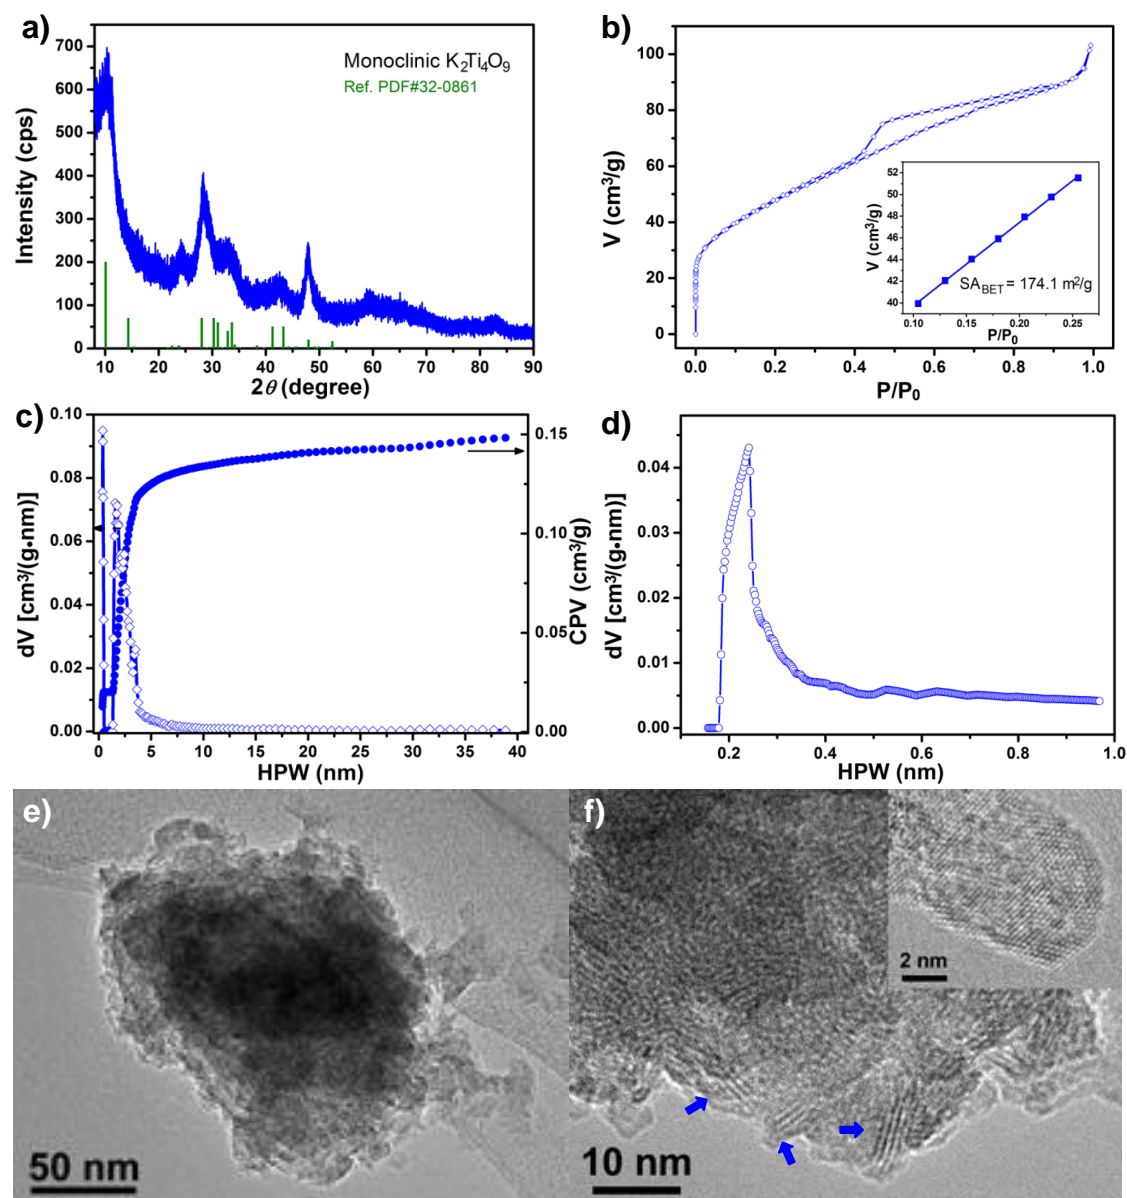

**Figure S13.** Crystal structure, pore and morphology characterizations for the  $K_2Ti_4O_9$  sample. (a) XRD pattern. (b) Nitrogen adsorption–desorption isotherms and linear part for BET surface area calculation (inset). (c,d) Pore distribution and cumulative pore volume analyzed by DFT (for micropore and mesopore) and HK (for micropore only) simulation; HPW, half pore width; CPV, cumulative pore volume. (e,f) TEM and HRTEM (f, inset) images.
